# Supplementary material for: Holocene forest and land-use history of the Erzgebirge, central Europe: a review of palynological data
Source: Copernicus journal article supplement (doi:10.5194/egqsj-72-127-2023), 2023-07-11
Supplement: Supplementary file 1 [file egqsj-72-127-2023-supplement.pdf]

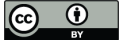

*Supplement of*

## **Holocene forest and land-use history of the Erzgebirge, central Europe: a review of palynological data**

**Knut Kaiser et al.**

*Correspondence to:* Knut Kaiser ([kaiserk@gfz-potsdam.de](mailto:kaiserk@gfz-potsdam.de))

The copyright of individual parts of the supplement might differ from the article licence.



Table S2: Pollen diagrams from the Erzgebirge Mountains used for analysis by Extended Downscaling Approach (EDA) with representation (indicated by "x") of main Holocene vegetation phases.

| Pollen diagram                              | ID  | Altitude<br>(m a.s.l.) | Holocene Vegetation phases <sup>1</sup> |   |    |     | Reference                            |
|---------------------------------------------|-----|------------------------|-----------------------------------------|---|----|-----|--------------------------------------|
|                                             |     |                        | C                                       | P | FP | AFP |                                      |
| Große Auerhahnbalz                          | 59  | 856                    | x                                       | x | x  |     | Rudolph and Firbas, 1924             |
| Blumenau bei Olbernhau                      | 62  | 435                    |                                         | x | x  | x   | Frenzel, 1930                        |
| Deutsch-Einsiedel                           | 56  | 725                    |                                         | x | x  | x   | Frenzel, 1930                        |
| Filzteich Ia+b                              | 48a | 568                    |                                         | x | x  | x   | Frenzel, 1930                        |
| Fláje-Kiefern/Fleyh                         | 3   | 751                    | x                                       | x |    | x   | Jankovská et al., 2007               |
| Gottesgab, Torfstich A, Reißzeche, Profil I | 24a | 1000                   | x                                       | x | x  | x   | Rudolph and Firbas, 1924             |
| Grünwalder Heide bei Moldau (Moldava)       | 4   | 852                    | x                                       | x | x  | x   | Rudolph and Firbas, 1924             |
| Hühnerheide, Hüh-S-3                        | 52  | 753                    | x                                       | x | x  | x   | Seifert-Eulen, 2016                  |
| Jägersgrün                                  | 47  | 628                    |                                         |   | x  | x   | Frenzel, 1930                        |
| Großer Kranichsee                           | 45  | 930                    |                                         | x |    | x   | Rudolph and Firbas, 1924             |
| Lehmheide                                   | 54  | 770                    | x                                       |   |    |     | Schlöffel, 2011; Seifert-Eulen, 2016 |
| Mothäuser Heide                             | 1   | 768                    | x                                       | x | x  | x   | Lange et al., 2005                   |
| Pfahlbergmoor                               | 43  | 1017                   | x                                       | x | x  | x   | Seifert-Eulen, 2016                  |
| Schwarze Heide, Sh-1                        | 53  | 758                    | x                                       | x |    |     | Seifert-Eulen, 2016                  |
| Sebastiansberger Hochmoor, Profil 5         | 29c | 842                    | x                                       | x | x  | x   | Schmeidl, 1940                       |
| Seeheide bei Georgenfeld-Zinnwald           | 58  | 870                    | x                                       | x |    | x   | Rudolph and Firbas, 1924             |
| Siebensäure                                 | 49a | 830                    | x                                       | x | x  | x   | Seifert-Eulen, 2016                  |

<sup>1</sup>C = *Corylus* phase, P = *Picea* phase, FP = *Fagus-Picea* phase, AFP = *Abies-Fagus-Picea* phase
